# Supplementary material for: IMC1b Is a Putative Membrane Skeleton Protein Involved in Cell Shape, Mechanical Strength, Motility, and Infectivity of Malaria Ookinetes
Source: PubMed Central journal article supplement — J Biol Chem. 2008 Oct 10;283(41):27604–11. doi: 10.1074/jbc.M801302200 (PMC2562075; doi:10.1074/jbc.m801302200), 2008-10-10

**IMC1b IS A PUTATIVE MEMBRANE SKELETON PROTEIN INVOLVED IN CELL SHAPE,  
MECHANICAL STRENGTH, MOTILITY AND INFECTIVITY OF MALARIA OOKINETES**  
Annie Z Tremp<sup>1</sup>, Emad I Khater<sup>2</sup>, Johannes T Dessens<sup>1</sup>

**SUPPLEMENTARY MATERIAL**

**Fig. S1.** A genetic tool for generating genetically modified parasites expressing GFP-tagged IMC1b. Step 1: the *imc1b* coding sequence plus its 5'UTR is cloned upstream of, and in-frame with, *egfp* in plasmid pDNR-EGFP. Step2: 3'UTR of *imc1b* is cloned into plasmid pLP-DHFR2. Step 3: The *imc1b*-specific sequences of the above plasmids are combined with the selectable marker cassette in plasmid pLP-IMC1b/EGFP by Cre-*loxP* recombination. *LoxP* sites are indicated by black arrows; noncoding sequences are indicated in white; coding sequences are indicated in light gray; *imc1b*-specific sequences are indicated in dark gray; Amp r: ampicillin resistance gene; Cm r: chloramphenicol resistance gene; SacB: sucrose gene from *Bacillus subtilis*; egfp: enhanced green fluorescent protein; UTR: untranslated region; pro: bacterial promoter sequence.

**Fig. S2.** Generation and molecular analysis of genetically modified parasite lines IMC1b/GFP (GFP) and IMC1b-KO (KO). **A:** Schematic diagram of wild-type (WT) and genetically modified *imc1b* loci on genomic DNA. Indicated are positions of the *HindIII* restriction sites (H), and expected *HindIII* restriction fragments (horizontal arrows) with sizes shown in kb. The sequences of the probes are indicated by thick lines. **B:** Southern blot analysis of *HindIII*-digested parasite genomic DNA. **C:** Reverse transcription-PCR analysis of ookinete samples. **D:** Western blot analysis of ookinete samples using anti-GFP antibodies. Apparent sizes of the bands are shown in kDa.

**Fig. S1**

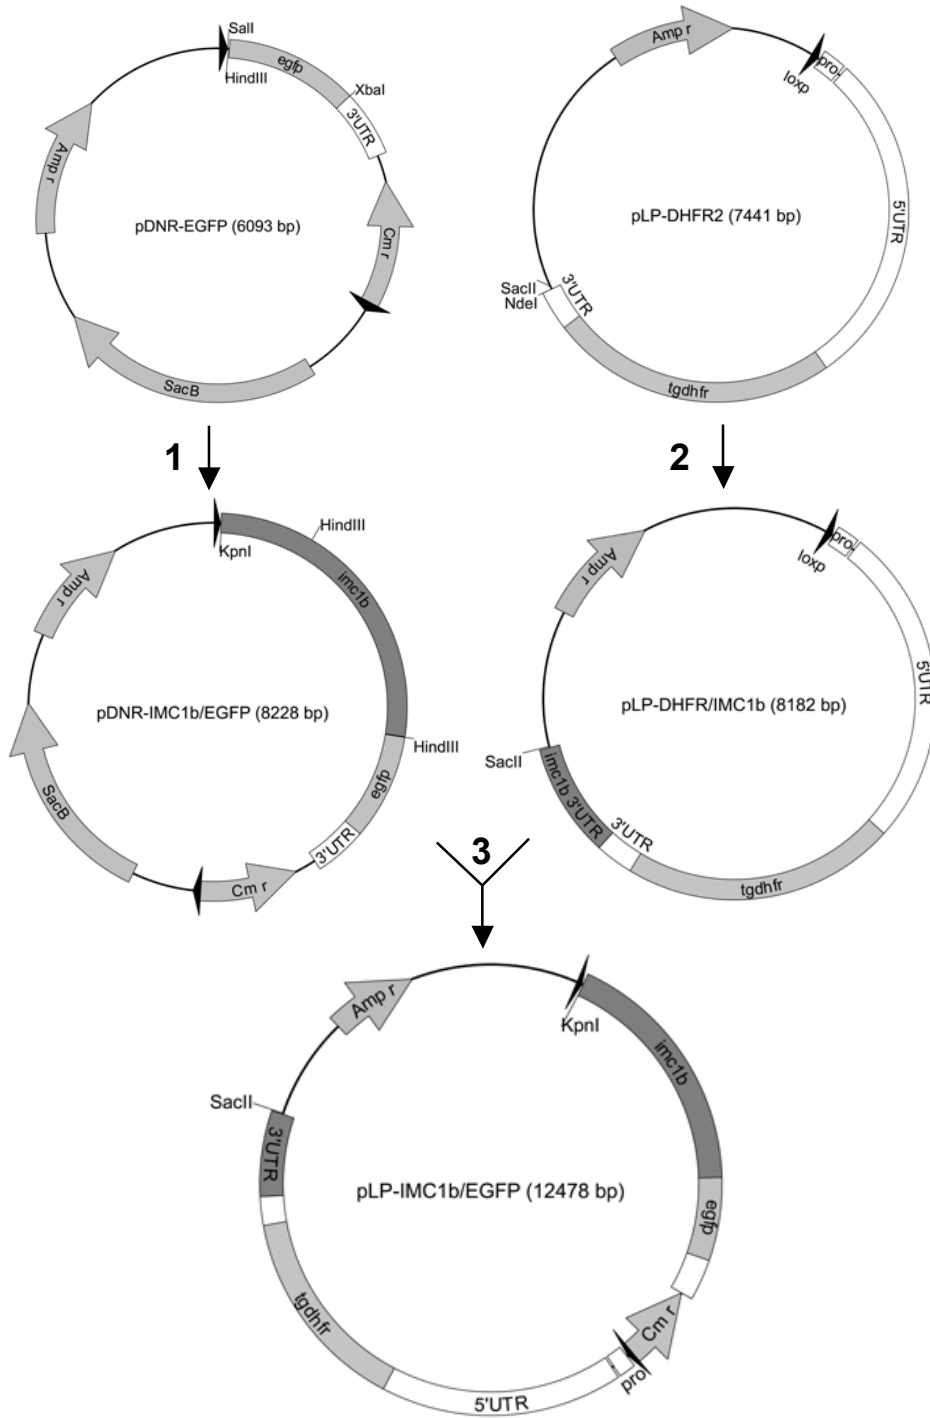

Fig. S2

A

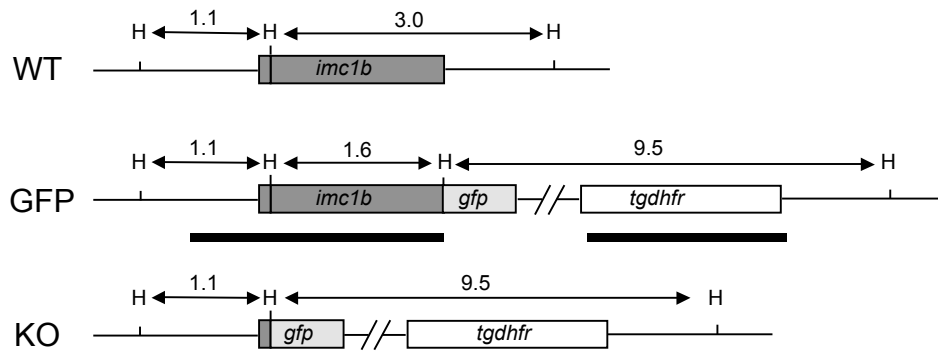

B

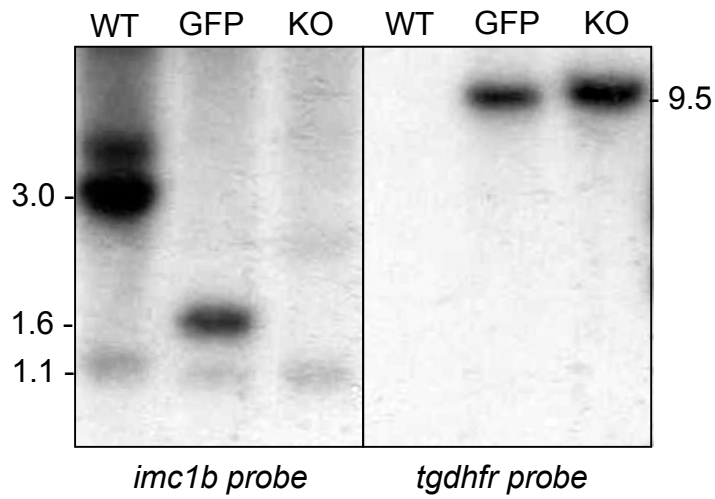

C

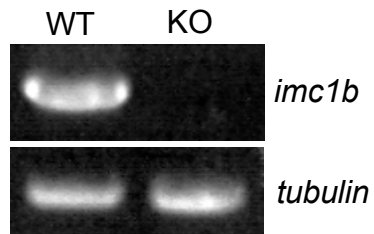

D

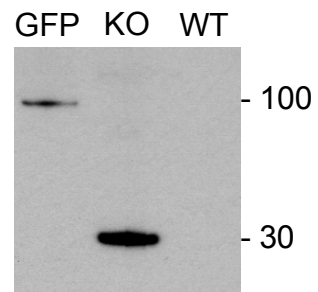

Supplement: M801302200_1.pdf [file M801302200_1.pdf]
